# Supplementary material
Source: PubMed Central journal article supplement (PMC3204020)

**A Staining (X10)**

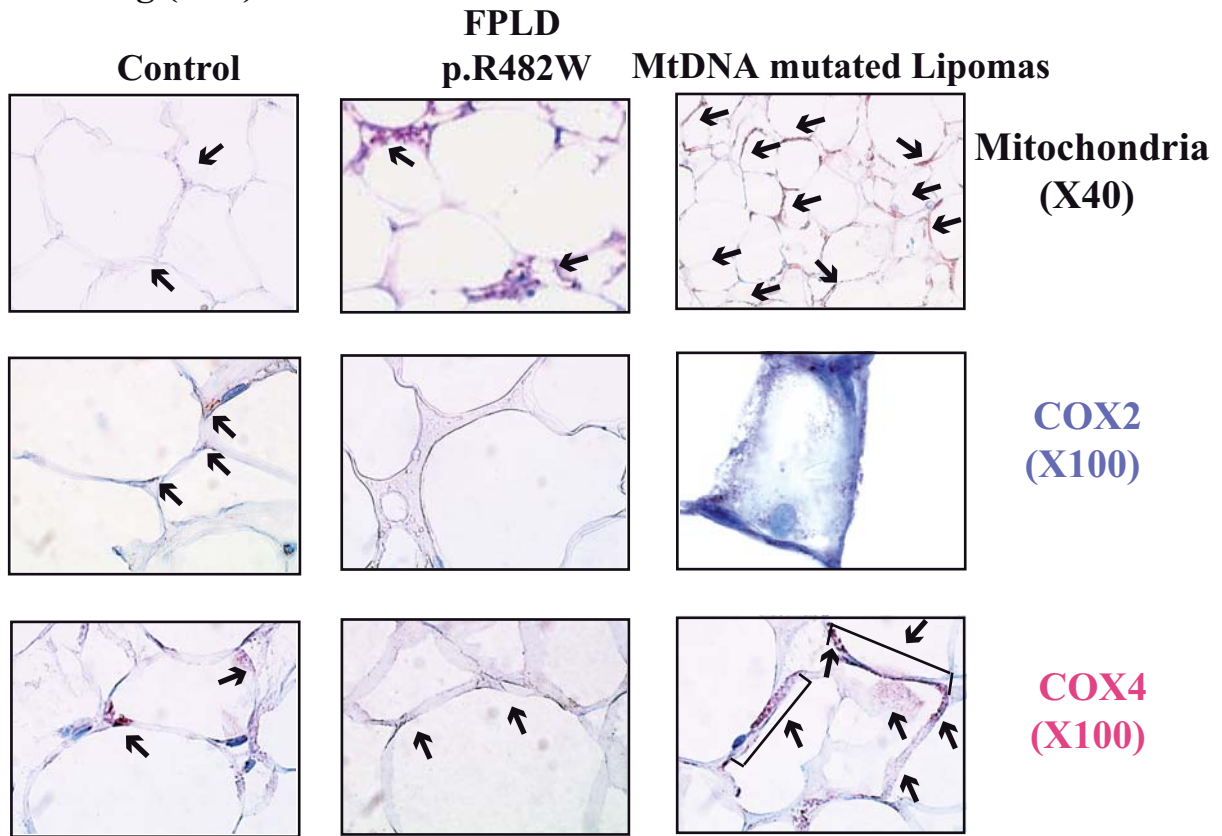

**B Western Blot**

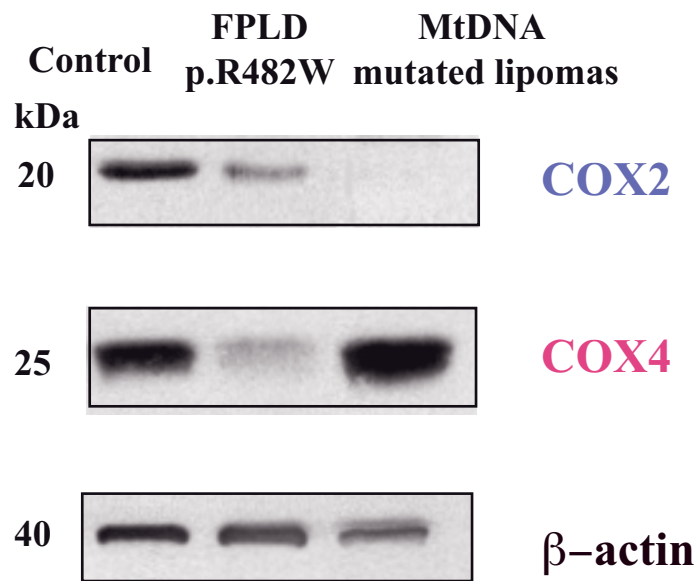

**Sup. Figure**

Supplement: mmc1.pdf [file mmc1.pdf]
